# Supplementary material for: A series of five divalent zinc and cadmium coordination polymers based on a new bifunctional ligand: syntheses, crystal structures, and properties
Source: Royal Society of Chemistry journal article supplement (doi:10.1039/c2ce06720j), 2012-01-01
Supplement: c2ce06720j.pdf [file c2ce06720j.pdf]

*Supporting Information for the Manuscript:*

**A series of five divalent zinc and cadmium coordination  
polymers based on a new bifunctional ligand: syntheses,  
crystal structures, and properties**

**Can Ji,<sup>a</sup> Bo Li,<sup>a</sup> Ming-Li Ma,<sup>a</sup> Shuang-Quan Zang,<sup>a\*</sup> Hong-Wei Hou<sup>a</sup> and Thomas C. W. Mak<sup>a,b</sup>.**

<sup>a</sup>The College of Chemistry and Molecular Engineering, Zhengzhou University,  
Zhengzhou 450001, P. R. China

<sup>b</sup>Department of Chemistry, The Chinese University of Hong Kong, Shatin, New  
Territories, Hong Kong SAR, P. R. China

Author for correspondence: Dr. S.-Q. Zang, E-mail: zangsqzg@zzu.edu.cn.

**This PDF file includes Table S1– S2 and Fig. S1– S7.**

**Table S1.** Hydrogen Bonds parameters in **1–3**.

**Table S2.** Emission and excitation maxima wavelengths of **1–5**.

**Fig. S1.** Top view of the open-ended, hollow nanotube of **4**.

**Fig. S2.** TG curves for compounds **1– 5**.

**Fig. S3** X-ray powder diffraction of complex **1** (a) simulated from single crystal data,  
(b) observed for complex **1**.

**Fig. S4** X-ray powder diffraction of complex **2** (a) simulated from single crystal data,  
(b) observed for complex **2**.

**Fig. S5** X-ray powder diffraction of complex **3** (a) simulated from single crystal data,  
(b) observed for complex **3**.

**Fig. S6** X-ray powder diffraction of complex **4** (a) simulated from single crystal data,  
(b) observed for complex **4**.

**Fig. S7** X-ray powder diffraction of complex **5** (a) simulated from single crystal data,  
(b) observed for complex **5**.

**Table1.** Selected Hydrogen-Bond Geometry (Å) for **1-3** (in Å and °)

| D-H...A                        | <i>d</i> (D...H) | <i>d</i> (H...A) | <i>d</i> (D...A) | ∠DHA  |
|--------------------------------|------------------|------------------|------------------|-------|
| Compound <b>1</b> <sup>a</sup> |                  |                  |                  |       |
| O(3W)-H(3WA)...O(1)            | 0.85             | 1.87             | 2.718(5)         | 170.6 |
| O(2W)-H(2WA)...O(2)#4          | 0.84             | 1.87             | 2.687(4)         | 164.9 |
| O(1W)-H(1WB)...O(2W)#5         | 0.84             | 1.92             | 2.713(5)         | 157.2 |
| O(1W)-H(1WA)...O(3W)#6         | 0.84             | 1.88             | 2.691(5)         | 162.2 |
| Compound <b>2</b> <sup>b</sup> |                  |                  |                  |       |
| O(1W)-H(1WA)...O(2W)#4         | 0.77             | 1.97             | 2.738(2)         | 172.1 |
| O(1W)-H(1WB)...O(3W)#5         | 0.79             | 1.91             | 2.685(4)         | 167.5 |
| O(2W)-H(2WA)...O(2)#6          | 0.84             | 1.87             | 2.691(3)         | 163.2 |
| O(3W)-H(3WB)...O(1)            | 0.85             | 1.87             | 2.719(3)         | 179.6 |
| O(3W)-H(3WA)...O(1)#7          | 0.85             | 1.96             | 2.738(3)         | 151.8 |
| Compound <b>3</b> <sup>c</sup> |                  |                  |                  |       |
| O(1W)-H(1WA)...Cl(1)#6         | 0.85             | 2.54             | 3.352(5)         | 159.4 |
| O(1W)-H(1WB)...O(2)#7          | 0.85             | 2.04             | 2.834(5)         | 154.7 |
| O(2W)-H(2WB)...O(1W)#8         | 0.85             | 1.96             | 2.802(17)        | 170.2 |
| O(2W)-H(2WA)...O(1W)#9         | 0.85             | 2.31             | 2.757(17)        | 113.0 |

Symmetry codes: <sup>a</sup> #4 -x+1/2, -y+1/2, -z+1; #5 -x, -y+1, -z; #6 -x+1/2, -y+1/2, -z. <sup>b</sup> #4 x, y-1, z; #5 x-1/2, y-1/2, z; #6 x, -y+1, z+1/2; #7 -x+1/2, -y+1/2, -z. <sup>c</sup> #6 -x, -y+1, -z+1; #7 -x+1, -y+1, -z+1; #8 -x+1, y-1/2, -z+1/2; #9 x+1, -y+3/2, z+1/2.

**Table S2.** Emission and excitation maxima wavelengths (nm)

| polymer             | HL  | <b>1</b> | <b>2</b> | <b>3</b> | <b>4</b> | <b>5</b> |
|---------------------|-----|----------|----------|----------|----------|----------|
| $\lambda_{em}$ (nm) | 451 | 436      | 413      | 481      | 449      | 468      |
| $\lambda_{ex}$ (nm) | 370 | 375      | 314      | 382      | 365      | 369      |

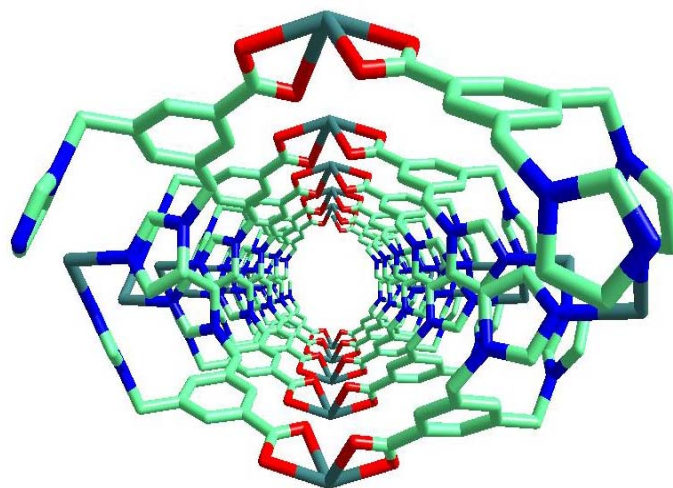

Fig. S1 Top view of the open-ended, hollow nanotube of **4**.

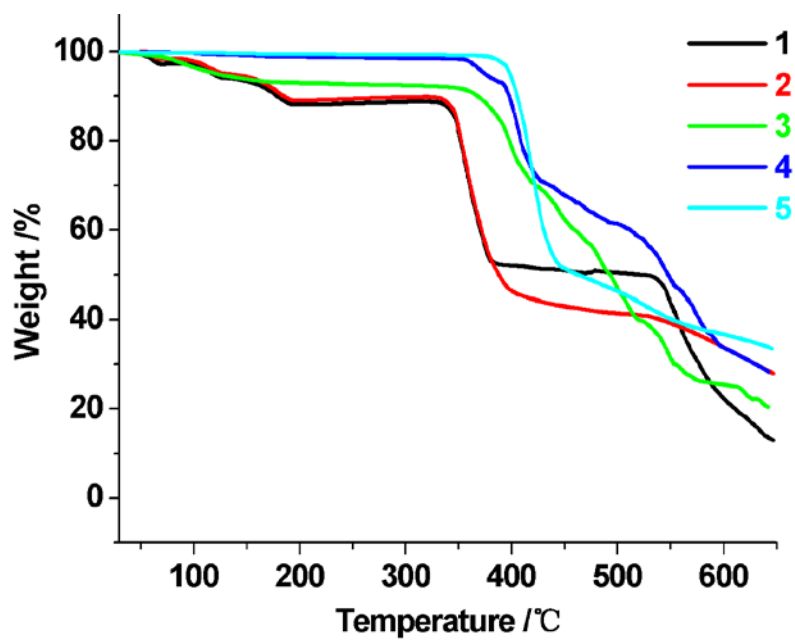

Fig. S2. The TG curves of complexes **1-5**.

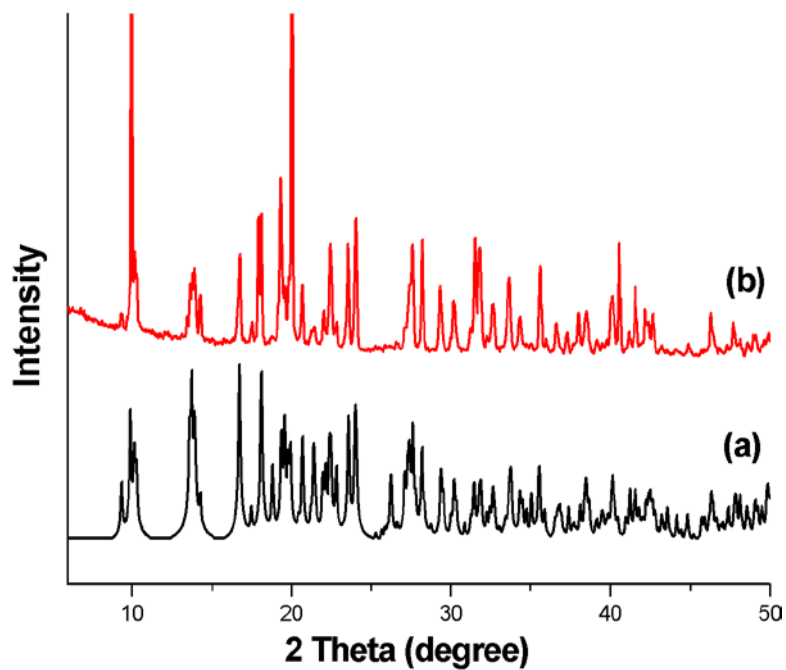

**Fig. S3** X-ray powder diffraction of complex **1** (a) simulated from single crystal data, (b) observed for complex **1**.

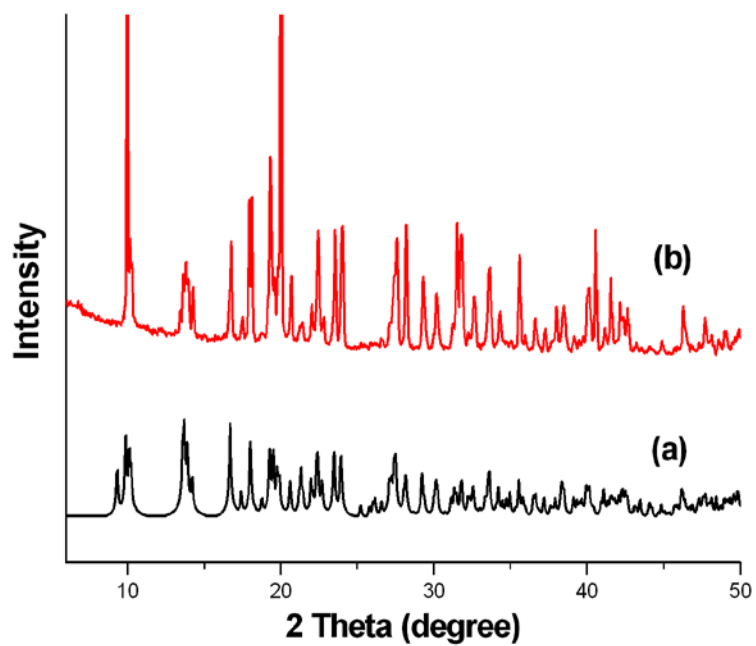

**Fig. S4** X-ray powder diffraction of complex **2** (a) simulated from single crystal data, (b) observed for complex **2**.

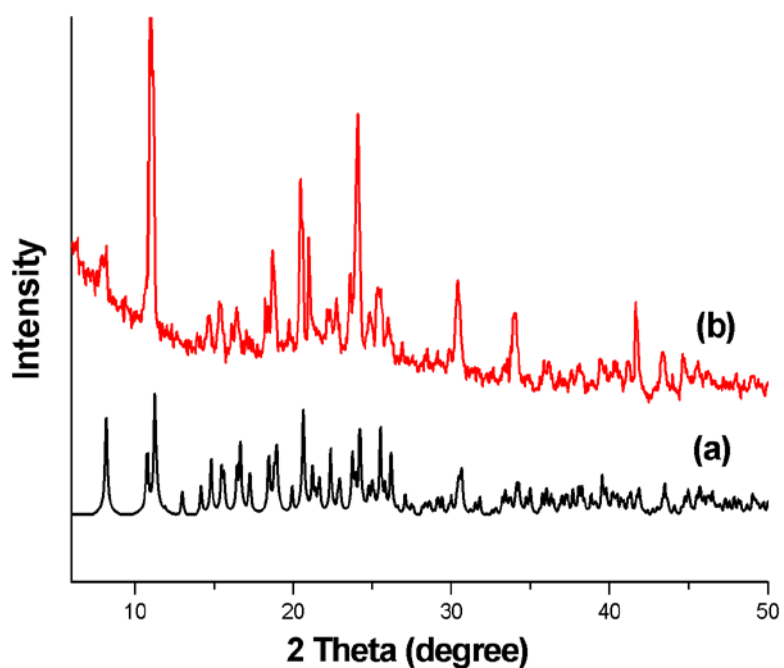

**Fig. S5** X-ray powder diffraction of complex **3** (a) simulated from single crystal data, (b) observed for complex **3**.

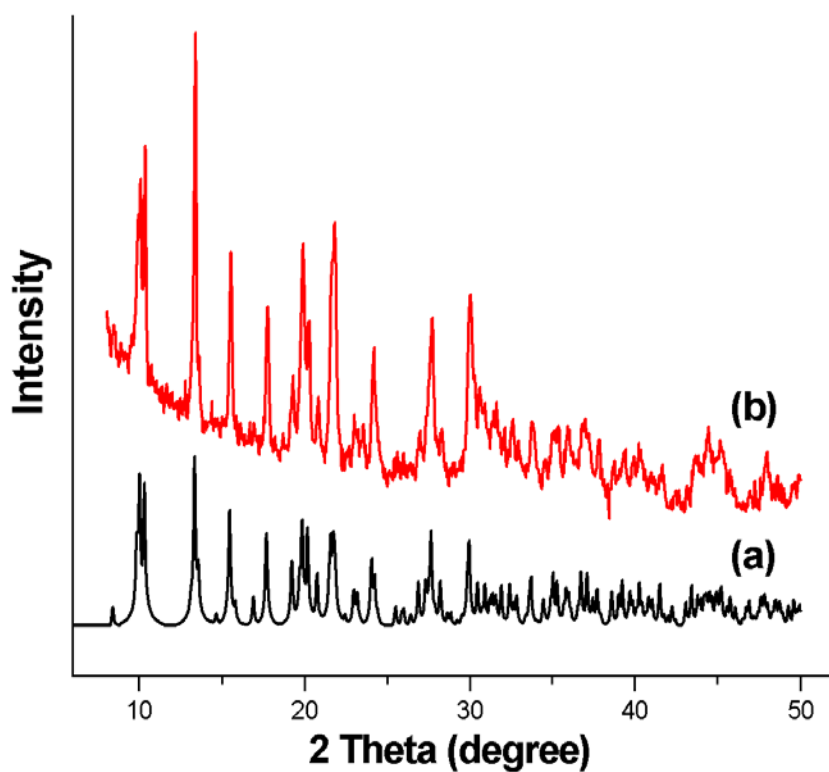

**Fig. S6** X-ray powder diffraction of complex **4** (a) simulated from single crystal data, (b) observed for complex **4**.

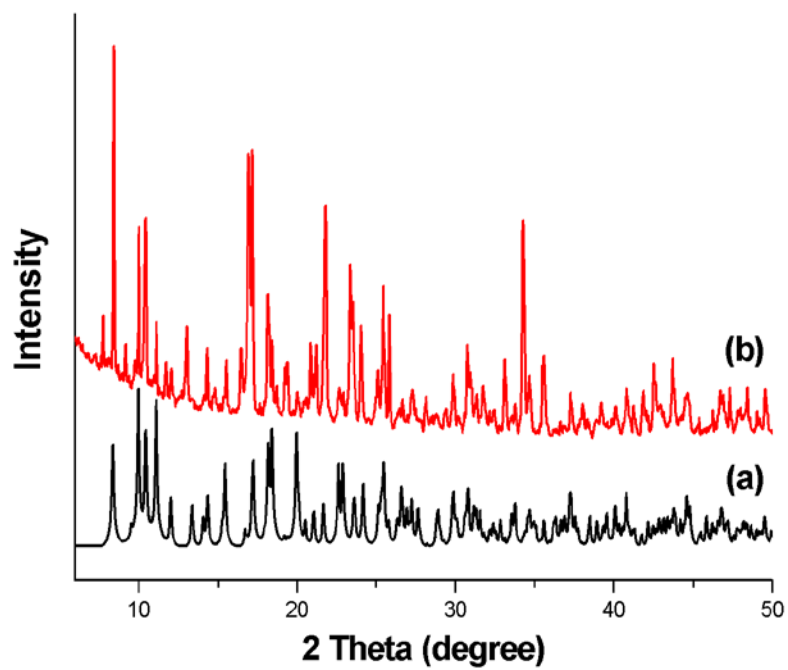

**Fig. S7** X-ray powder diffraction of complex **5** (a) simulated from single crystal data, (b) observed for complex **5**.
